# Supplementary material for: Impact of postoperative pain on patient satisfaction and quality of life after surgery for thoracic OPLL and OLF
Source: Research Square preprint supplement (doi:10.21203/rs.3.rs-7438838/v1), 2025-12-30
Supplement: Supplementary file 1 [file 9784707cad3eebf89a301517.docx]

**Supplemental Figures**

**Supplemental Fig. 1.**

**
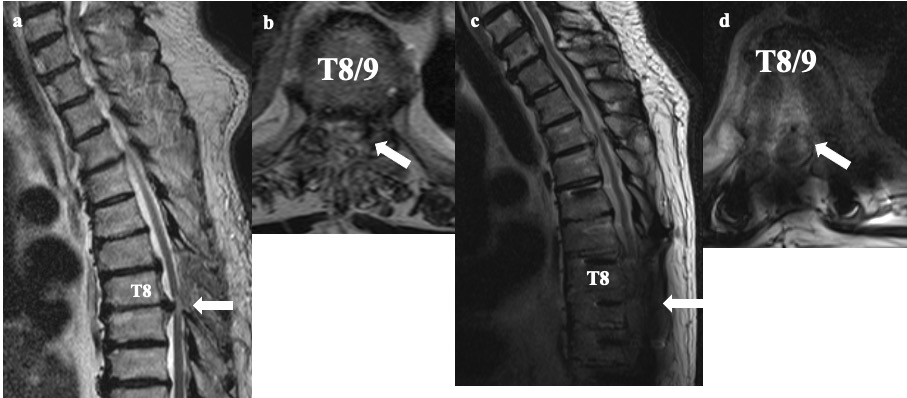
**

**Supplemental Fig. 2**

**
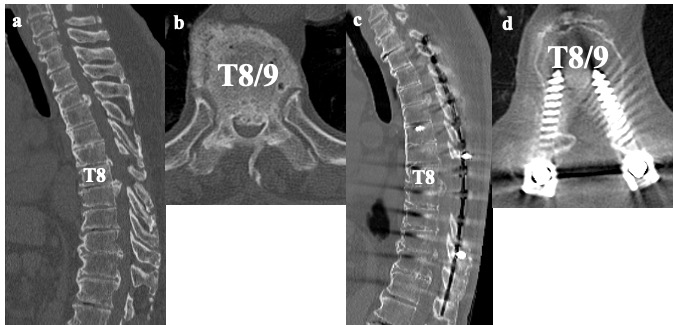
**

**Supplemental Fig. 3.**

**
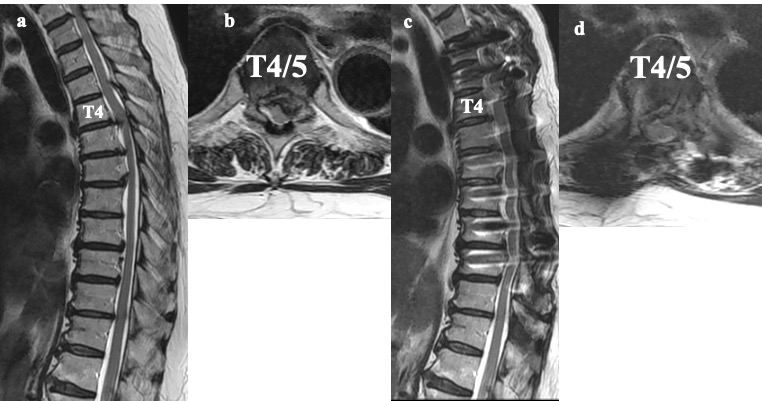
**

**Supplemental Fig. 4.**

**
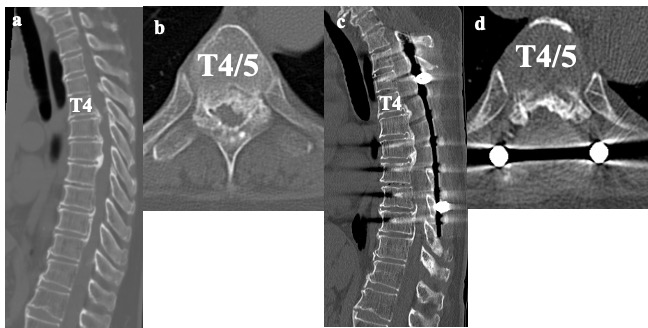
**

**Supplemental Figures‘ Legends**

**Supplemental Fig. 1.** Case 1: MRI scan of the 84-year-old male patient with cervical and thoracic OPLL+OLF. (**a**) Preoperative sagittal plane MRI; (**b**) preoperative axial plane MRI; (**c**) 8-year postoperative sagittal plane MRI; and (**d**) 8-year postoperative axial plane MRI. The white arrows show the intraspinal high-intensity areas. MRI, magnetic resonance imaging; OPLL, ossification of the posterior longitudinal ligament; OLF, ossification of the ligamentum flavum.

**Supplemental Fig. 2.** Case 1: CT scan of the 84-year-old male patient with cervical and thoracic OPLL+OLF. (**a**) Preoperative sagittal plane CT; (**b**) preoperative axial plane CT; (**c**) 8-year postoperative sagittal plane CT; and (**d**) 8-year postoperative axial plane CT. CT, computed tomography; OPLL, ossification of the posterior longitudinal ligament; OLF, ossification of the ligamentum flavum.

**Supplemental Fig. 3.** Case 2: MRI scan of the 61-year-old female patient with cervical and thoracic OPLL+OLF. (**a**) Preoperative sagittal plane MRI; (**b**) preoperative axial plane MRI; (**c**) 10-year postoperative sagittal plane MRI; and (**d**) 10-year postoperative axial plane MRI. MRI, magnetic resonance imaging; OPLL, ossification of the posterior longitudinal ligament; OLF, ossification of the ligamentum flavum.

**Supplemental Fig. 4.** Case 2: CT scan of the 61-year-old male patient with cervical and thoracic OPLL+OLF. (**a**) Preoperative sagittal plane CT; (**b**) preoperative axial plane CT; (**c**) 10-year postoperative sagittal plane CT; and (**d**) 10-year postoperative axial plane CT. CT, computed tomography; OPLL, ossification of the posterior longitudinal ligament; OLF, ossification of the ligamentum flavum.
